# Supplementary material for: Mezcal worm in a bottle: DNA evidence suggests a single moth species
Source: PeerJ journal article supplement (doi:10.7717/peerj.14948), 2023-03-08

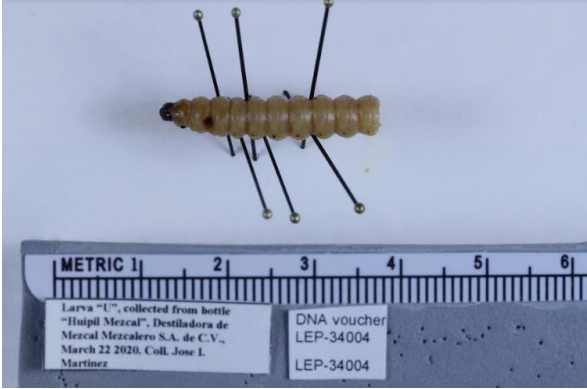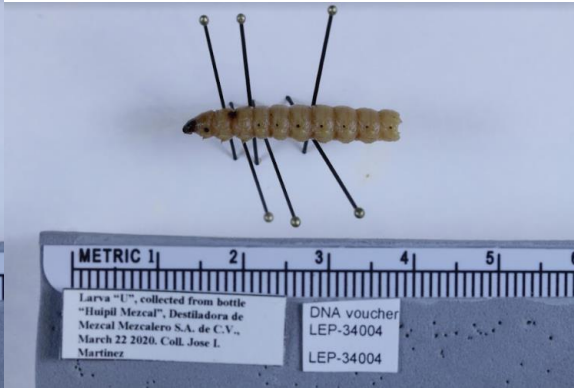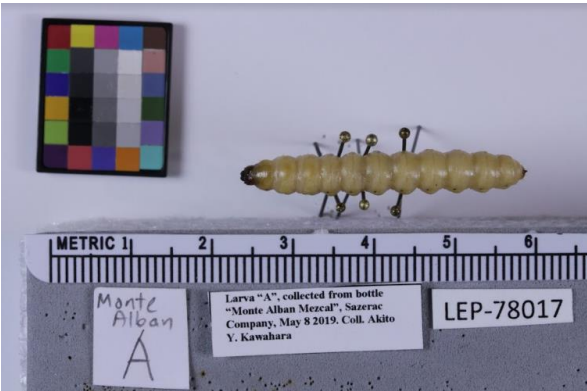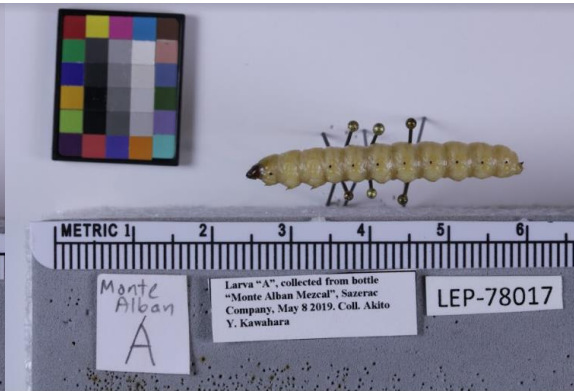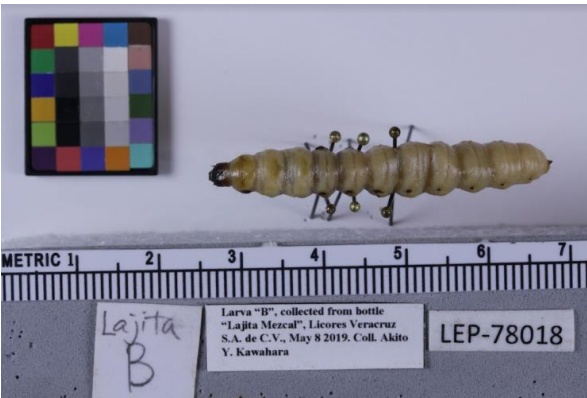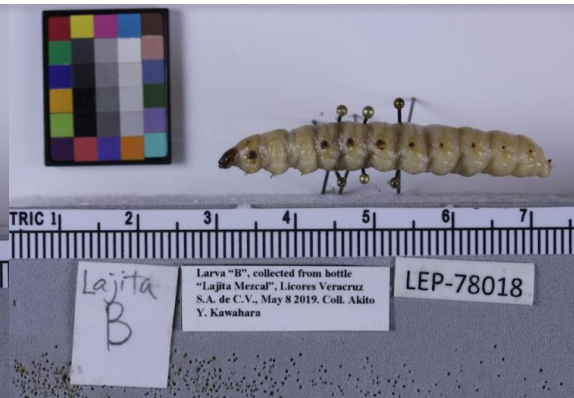

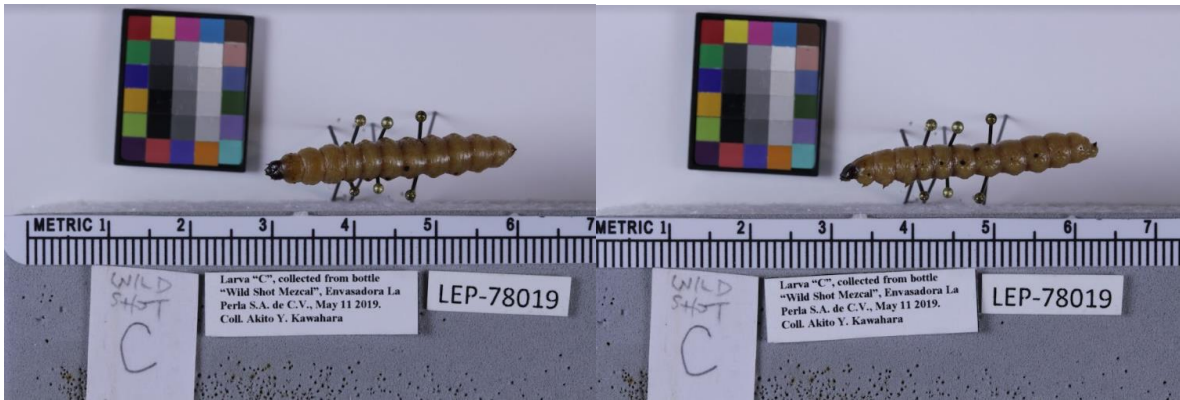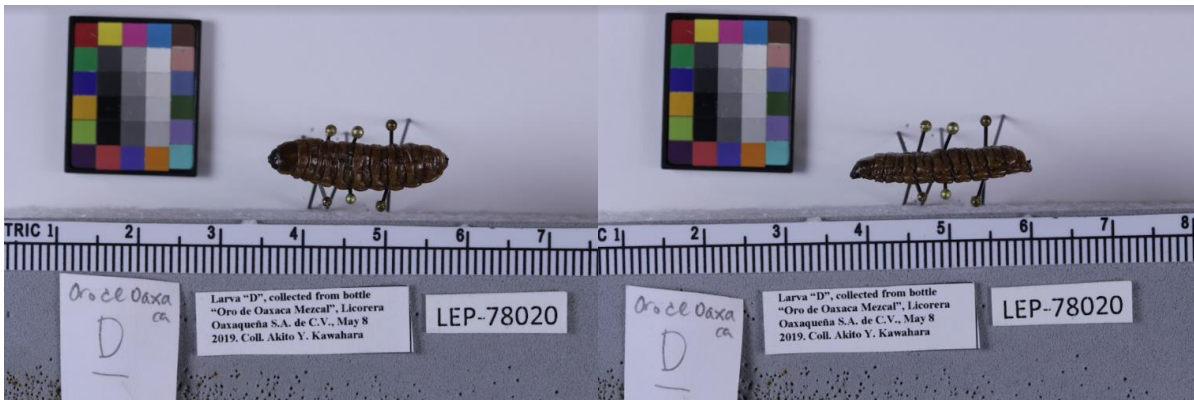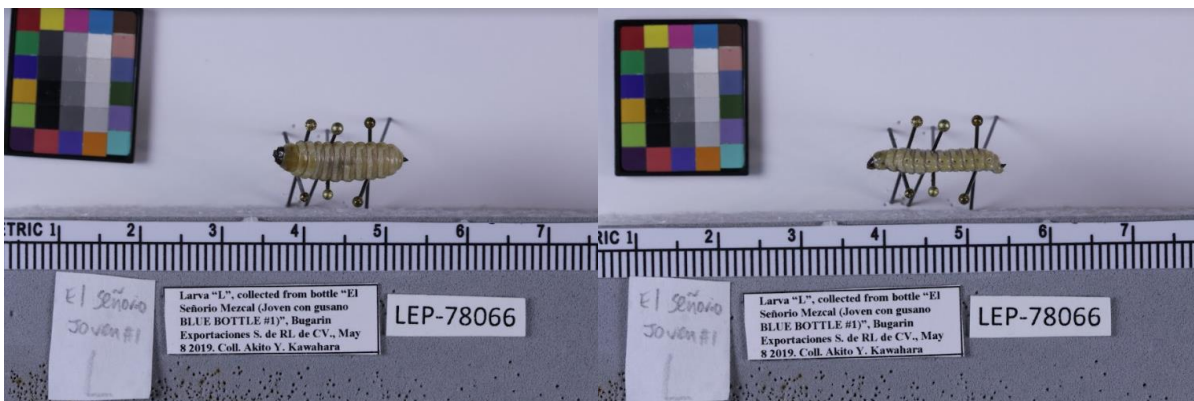

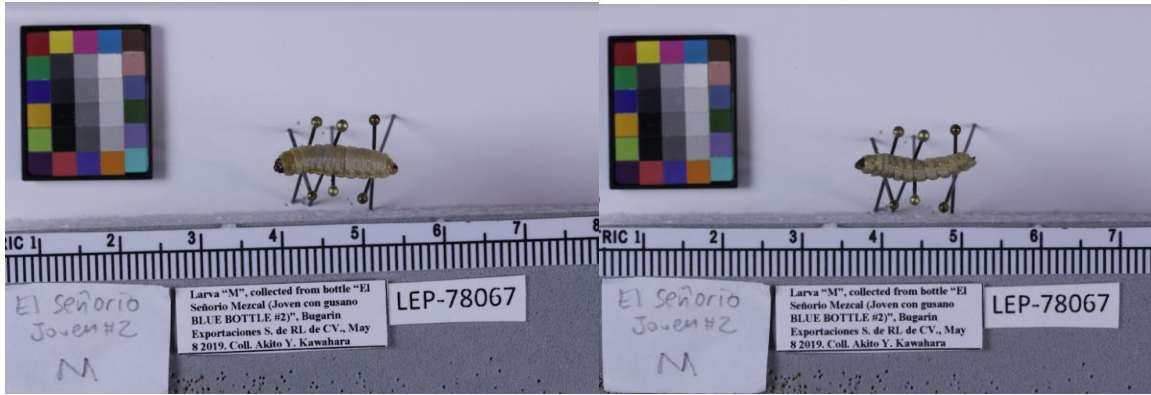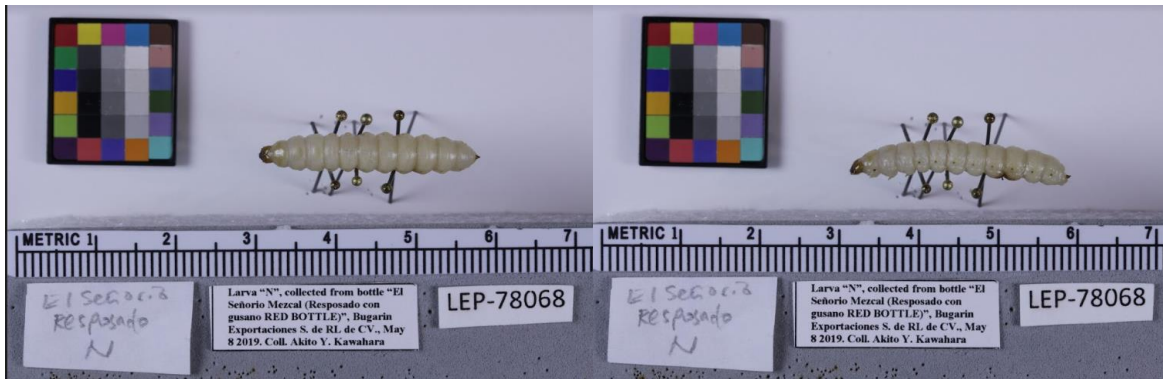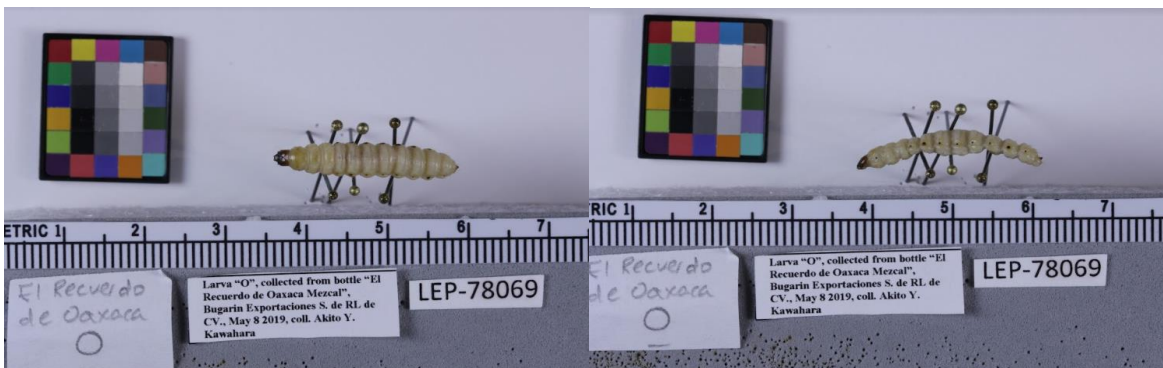



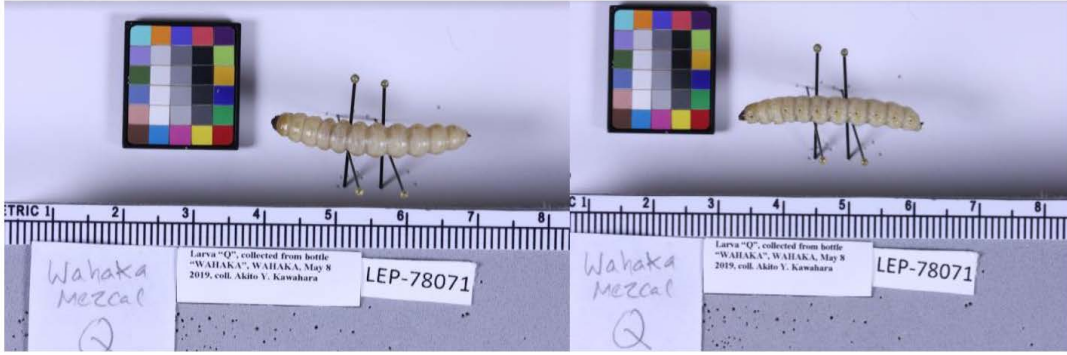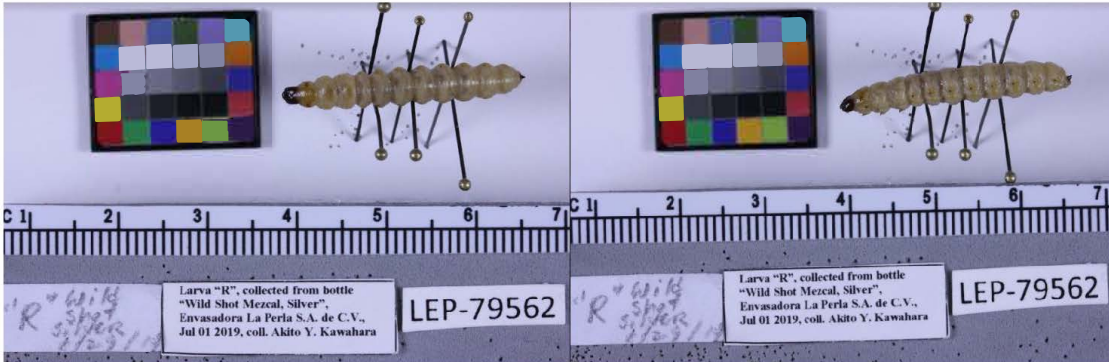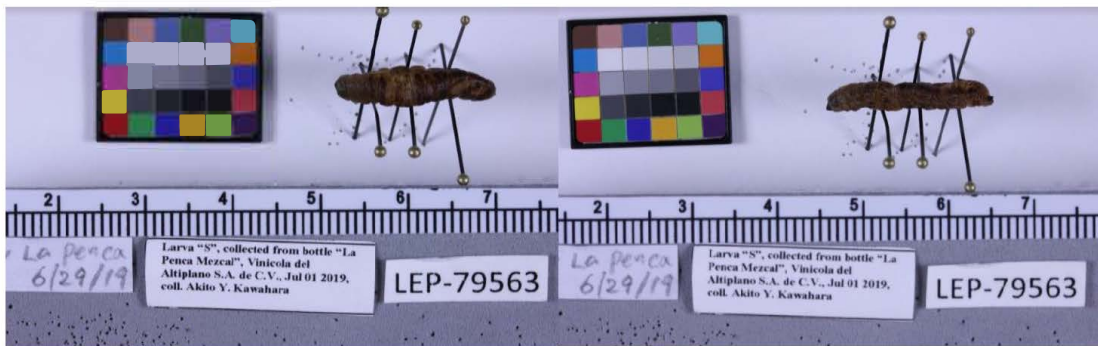



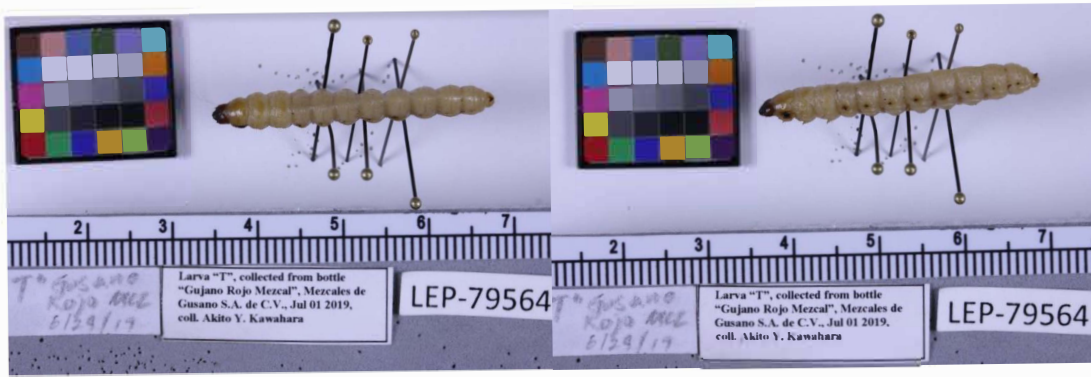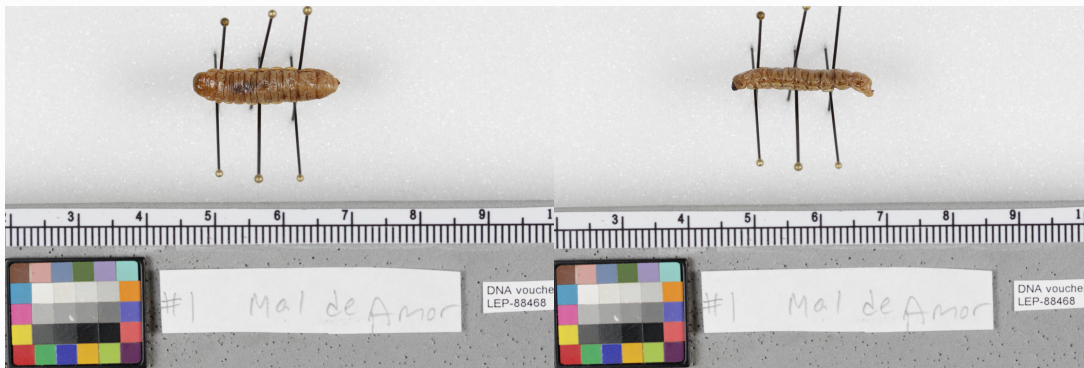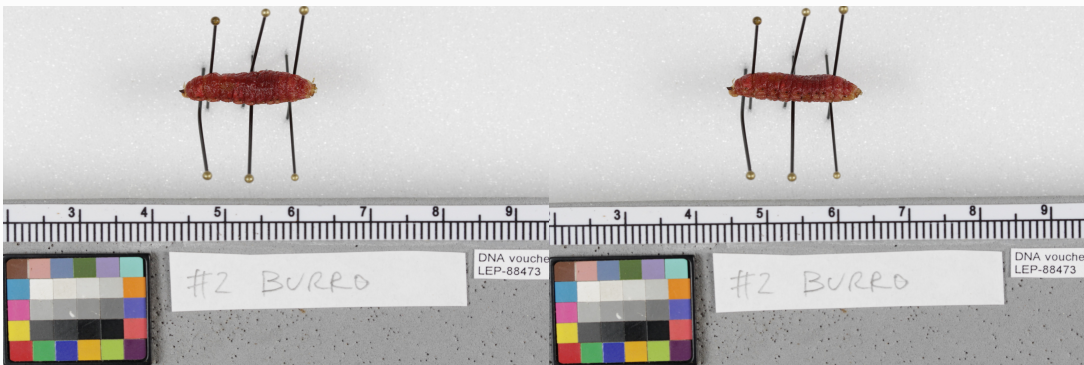

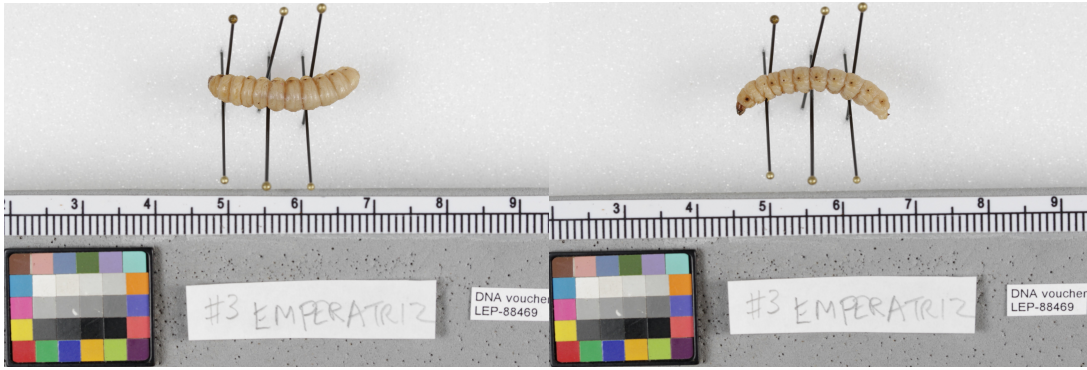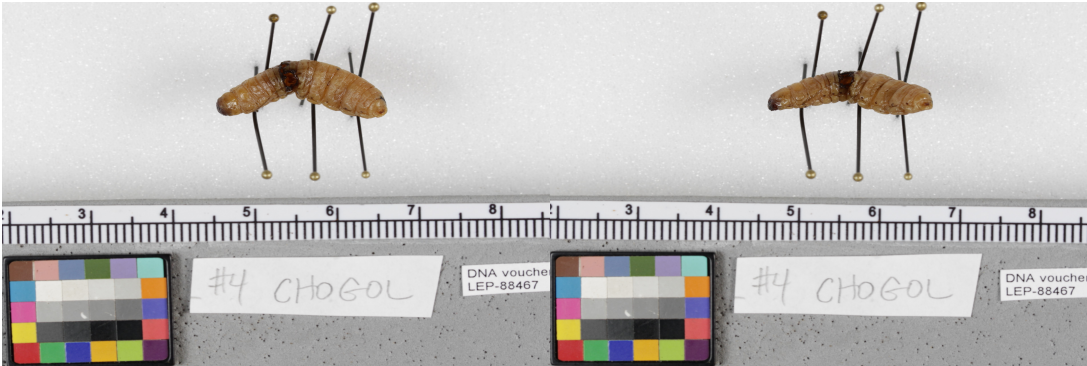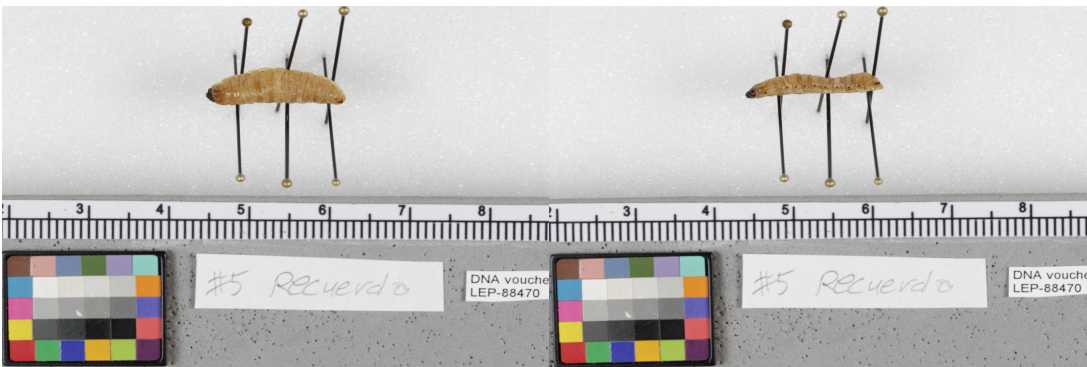

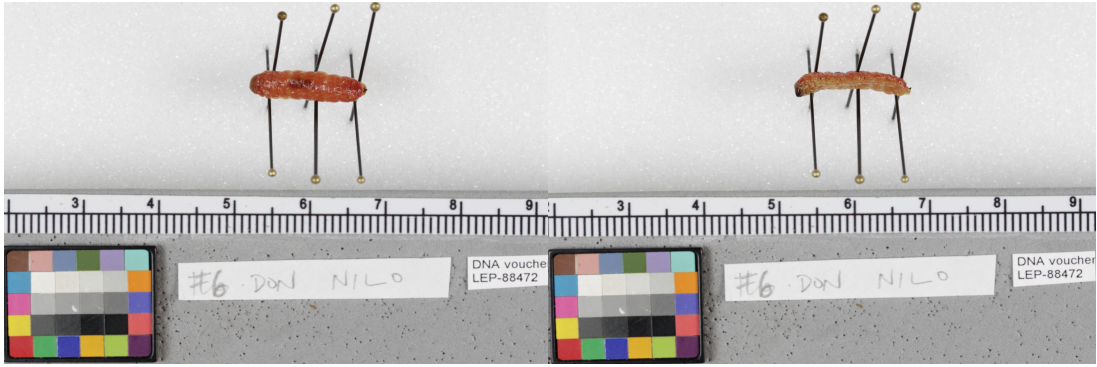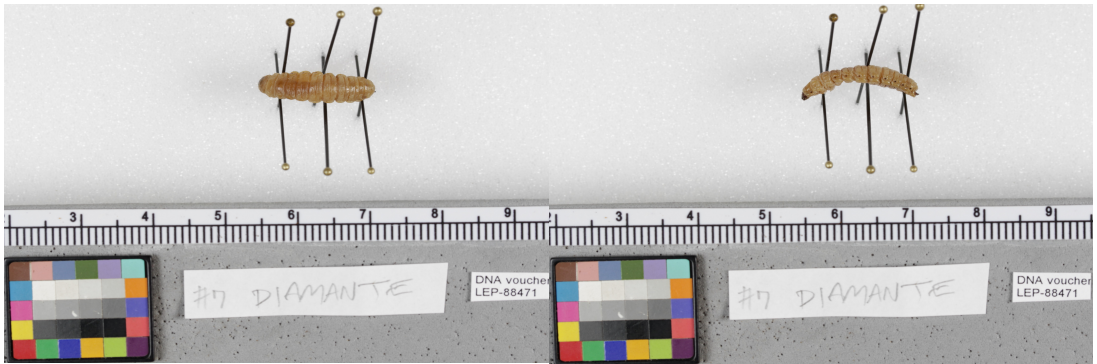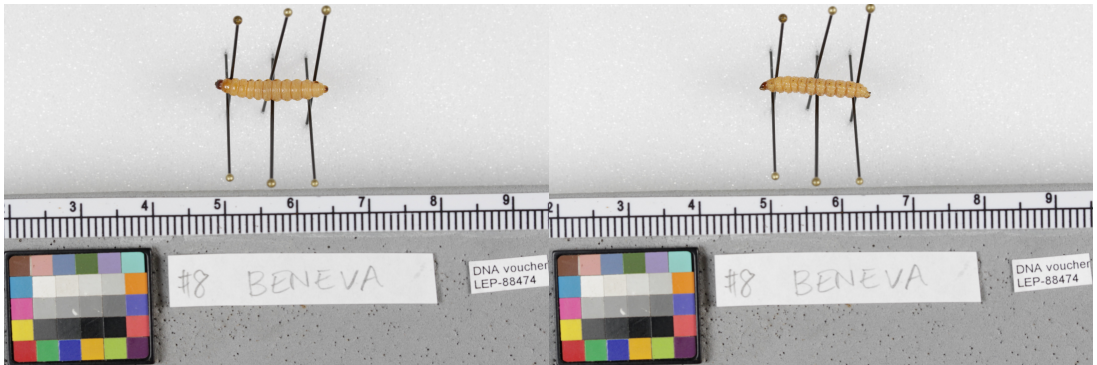

Supplement: Larval_Vouchers.pdf [file Larval_Vouchers.pdf]
