# Supplementary material for: Mezcal worm in a bottle: DNA evidence suggests a single moth species
Source: PeerJ. 2023 Mar 8;11:e14948. doi: 10.7717/peerj.14948 (PMC10007961; doi:10.7717/peerj.14948)
Supplement: Supplemental Information 4 [file peerj-11-14948-s004.xlsx]

## Sheet: Sheet1
Supplementary File 4. Pairwise distance (similarity) table for all samples in the CO1 data matrix.
	LNAUS078N12 Hypopta palmata COIN5P	AWCL050N09 Acossus populi COIN5P	IAWL1040N09 Comadia henrici COIN5P	GBGL10960N12 Comadia redtenbacheri COIN5P JN673376	GBGL10961N12 Comadia redtenbacheri COIN5P JN673377	GBGL26633N19 Comadia redtenbacheri COIN5P MH443780	GBGL26634N19 Comadia redtenbacheri COIN5P MH443781	GBGL26635N19 Comadia redtenbacheri COIN5P MH443783	GBGL26636N19 Comadia redtenbacheri COIN5P MH443784	GBGL26637N19 Comadia redtenbacheri COIN5P MH443782	LEP78017 Cossidae Comadia redtenbacheri MonteAlban COI	LEP78018 Cossidae Comadia redtenbacheri Lajita COI	LEP78020 Cossidae Comadia redtenbacheri OroDeOaxaca COI	LEP78066 Cossidae Comadia redtenbacheri ElSeñorioJoven1 COI reversed	LEP78067 Cossidae Comadia redtenbacheri ElSeñorioJoven2 COI reversed	LEP78068 Cossidae Comadia redtenbacheri ElSeñorioReposado COI	LEP78069 Cossidae Comadia redtenbacheri ElRecuerdoDeOaxaca COI	LEP78071 Cossidae Comadia redtenbacheri Wahaka COI reversed	LEP79562 Cossidae Comadia redtenbacheri WildShot COI	LEP79564 Cossidae Comadia redtenbacheri GusanoRojo COI	LEP88467 Cossidae Comadia redtenbacheri Chogol COI	LEP88468 Cossidae Comadia redtenbacheri Mal de amor COI	LEP88469 Cossidae Comadia redtenbacheri Emperatriz COI	LEP88470 Cossidae Comadia redtenbacheri Recuerdo COI	LEP88471 Cossidae Comadia redtenbacheri Diamante COI	LEP88472 Cossidae Comadia redtenbacheri Don Nilo COI	LEP88473 Cossidae Comadia redtenbacheri Burro COI	LEP88474 Cossidae Comadia redtenbacheri Beneva COI	LNAUS061N12 Comadia redtenbacheri COIN5P	LNAUS062N12 Comadia redtenbacheri COIN5P	LNAUS063N12 Comadia redtenbacheri COIN5P	LNAUS107N12 Comadia redtenbacheri COIN5P
LNAUS078N12 Hypopta palmata COIN5P		0.173913	0.184348	0.18087	0.182609	0.182609	0.182609	0.182609	0.182609	0.182609	0.182667	0.182609	0.182609	0.182609	0.18319	0.182609	0.182609	0.182609	0.18087	0.182609	0.184463	0.179138	0.182664	0.182719	0.182761	0.182609	0.192545	0.182474	0.182609	0.185722	0.185722	0.182609
AWCL050N09 Acossus populi COIN5P	0.173913		0.14087	0.12	0.121739	0.121739	0.121739	0.121739	0.121739	0.121739	0.117815	0.121739	0.121739	0.121739	0.121963	0.121739	0.121739	0.121739	0.123478	0.121739	0.123664	0.125304	0.121771	0.121802	0.121816	0.121739	0.129826	0.125092	0.121739	0.119936	0.119936	0.121739
IAWL1040N09 Comadia henrici COIN5P	0.184348	0.14087		0.0817391	0.0834783	0.0834783	0.0834783	0.0852174	0.0834783	0.0834783	0.0835407	0.0852174	0.0834783	0.0852174	0.0874863	0.0852174	0.0852174	0.0834783	0.0869565	0.0834783	0.0853862	0.0887429	0.0852634	0.0853093	0.0835822	0.0852174	0.0948624	0.0834023	0.0834783	0.0821945	0.0821945	0.0834783
GBGL10960N12 Comadia redtenbacheri COIN5P JN673376	0.18087	0.12	0.0817391		0.00173913	0.00173913	0.00173913	0.00521739	0.00173913	0.00173913	0.00180729	0.00521739	0.00173913	0.00521739	0.00192521	0.00521739	0.00521739	0.00173913	0.00695652	0.00173913	0.00695374	0.00695857	0.00522444	0.00523148	0.00173023	0.00521739	0.0192023	0.00872514	0.00173913	0.00205969	0.00205969	0.00173913
GBGL10961N12 Comadia redtenbacheri COIN5P JN673377	0.182609	0.121739	0.0834783	0.00173913		0	0	0.00347826	0	0	0	0.00347826	0	0.00347826	0	0.00347826	0.00347826	0	0.00521739	0	0.00522351	0.00522538	0.00348827	0.00349829	0	0.00347826	0.0174839	0.00696681	0	0	0	0
GBGL26633N19 Comadia redtenbacheri COIN5P MH443780	0.182609	0.121739	0.0834783	0.00173913	0		0	0.00347826	0	0	0	0.00347826	0	0.00347826	0	0.00347826	0.00347826	0	0.00521739	0	0.00522351	0.00522538	0.00348827	0.00349829	0	0.00347826	0.0174839	0.00696681	0	0	0	0
GBGL26634N19 Comadia redtenbacheri COIN5P MH443781	0.182609	0.121739	0.0834783	0.00173913	0	0		0.00347826	0	0	0	0.00347826	0	0.00347826	0	0.00347826	0.00347826	0	0.00521739	0	0.00522351	0.00522538	0.00348827	0.00349829	0	0.00347826	0.0174839	0.00696681	0	0	0	0
GBGL26635N19 Comadia redtenbacheri COIN5P MH443783	0.182609	0.121739	0.0852174	0.00521739	0.00347826	0.00347826	0.00347826		0.00347826	0.00347826	0.00366604	0	0.00347826	0	0.00389574	0	0	0.00347826	0.00173913	0.00347826	0.00870069	0.00871756	0	0	0.00346045	0	0.0139978	0.00696681	0.00347826	0.00400275	0.00400275	0.00347826
GBGL26636N19 Comadia redtenbacheri COIN5P MH443784	0.182609	0.121739	0.0834783	0.00173913	0	0	0	0.00347826		0	0	0.00347826	0	0.00347826	0	0.00347826	0.00347826	0	0.00521739	0	0.00522351	0.00522538	0.00348827	0.00349829	0	0.00347826	0.0174839	0.00696681	0	0	0	0
GBGL26637N19 Comadia redtenbacheri COIN5P MH443782	0.182609	0.121739	0.0834783	0.00173913	0	0	0	0.00347826	0		0	0.00347826	0	0.00347826	0	0.00347826	0.00347826	0	0.00521739	0	0.00522351	0.00522538	0.00348827	0.00349829	0	0.00347826	0.0174839	0.00696681	0	0	0	0
LEP78017 Cossidae Comadia redtenbacheri MonteAlban COI	0.182667	0.117815	0.0835407	0.00180729	0	0	0	0.00366604	0	0		0.00366604	0	0.00366604	0	0.00366604	0.00366604	0	0.00547371	0	0	0.00541816	0.00367666	0.00368728	0	0.00366604	0.00727575	0.00365163	0	0	0	0
LEP78018 Cossidae Comadia redtenbacheri Lajita COI	0.182609	0.121739	0.0852174	0.00521739	0.00347826	0.00347826	0.00347826	0	0.00347826	0.00347826	0.00366604		0.00347826	0	0.00389574	0	0	0.00347826	0.00173913	0.00347826	0.00870069	0.00871756	0	0	0.00346045	0	0.0139978	0.00696681	0.00347826	0.00400275	0.00400275	0.00347826
LEP78020 Cossidae Comadia redtenbacheri OroDeOaxaca COI	0.182609	0.121739	0.0834783	0.00173913	0	0	0	0.00347826	0	0	0	0.00347826		0.00347826	0	0.00347826	0.00347826	0	0.00521739	0	0.00522351	0.00522538	0.00348827	0.00349829	0	0.00347826	0.0174839	0.00696681	0	0	0	0
LEP78066 Cossidae Comadia redtenbacheri ElSeñorioJoven1 COI reversed	0.182609	0.121739	0.0852174	0.00521739	0.00347826	0.00347826	0.00347826	0	0.00347826	0.00347826	0.00366604	0	0.00347826		0.00389574	0	0	0.00347826	0.00173913	0.00347826	0.00870069	0.00871756	0	0	0.00346045	0	0.0139978	0.00696681	0.00347826	0.00400275	0.00400275	0.00347826
LEP78067 Cossidae Comadia redtenbacheri ElSeñorioJoven2 COI reversed	0.18319	0.121963	0.0874863	0.00192521	0	0	0	0.00389574	0	0	0	0.00389574	0	0.00389574		0.00389574	0.00389574	0	0.00582205	0	0	0.00378603	0.00390708	0.00391842	0	0.00389574	0.00768468	0.00381803	0	0	0	0
LEP78068 Cossidae Comadia redtenbacheri ElSeñorioReposado COI	0.182609	0.121739	0.0852174	0.00521739	0.00347826	0.00347826	0.00347826	0	0.00347826	0.00347826	0.00366604	0	0.00347826	0	0.00389574		0	0.00347826	0.00173913	0.00347826	0.00870069	0.00871756	0	0	0.00346045	0	0.0139978	0.00696681	0.00347826	0.00400275	0.00400275	0.00347826
LEP78069 Cossidae Comadia redtenbacheri ElRecuerdoDeOaxaca COI	0.182609	0.121739	0.0852174	0.00521739	0.00347826	0.00347826	0.00347826	0	0.00347826	0.00347826	0.00366604	0	0.00347826	0	0.00389574	0		0.00347826	0.00173913	0.00347826	0.00870069	0.00871756	0	0	0.00346045	0	0.0139978	0.00696681	0.00347826	0.00400275	0.00400275	0.00347826
LEP78071 Cossidae Comadia redtenbacheri Wahaka COI reversed	0.182609	0.121739	0.0834783	0.00173913	0	0	0	0.00347826	0	0	0	0.00347826	0	0.00347826	0	0.00347826	0.00347826		0.00521739	0	0.00522351	0.00522538	0.00348827	0.00349829	0	0.00347826	0.0174839	0.00696681	0	0	0	0
LEP79562 Cossidae Comadia redtenbacheri WildShot COI	0.18087	0.123478	0.0869565	0.00695652	0.00521739	0.00521739	0.00521739	0.00173913	0.00521739	0.00521739	0.00547371	0.00173913	0.00521739	0.00173913	0.00582205	0.00173913	0.00173913	0.00521739		0.00521739	0.0104309	0.00697514	0.00173616	0.00173319	0.00519068	0.00173913	0.0157162	0.00872514	0.00521739	0.00606446	0.00606446	0.00521739
LEP79564 Cossidae Comadia redtenbacheri GusanoRojo COI	0.182609	0.121739	0.0834783	0.00173913	0	0	0	0.00347826	0	0	0	0.00347826	0	0.00347826	0	0.00347826	0.00347826	0	0.00521739		0.00522351	0.00522538	0.00348827	0.00349829	0	0.00347826	0.0174839	0.00696681	0	0	0	0
LEP88467 Cossidae Comadia redtenbacheri Chogol COI	0.184463	0.123664	0.0853862	0.00695374	0.00522351	0.00522351	0.00522351	0.00870069	0.00522351	0.00522351	0	0.00870069	0.00522351	0.00870069	0	0.00870069	0.00870069	0.00522351	0.0104309	0.00522351		0.0121498	0.0103972	0.00871886	0.00522095	0.00870069	0.0139193	0.0121619	0.00522351	0	0	0.00522351
LEP88468 Cossidae Comadia redtenbacheri Mal de amor COI	0.179138	0.125304	0.0887429	0.00695857	0.00522538	0.00522538	0.00522538	0.00871756	0.00522538	0.00522538	0.00541816	0.00871756	0.00522538	0.00871756	0.00378603	0.00871756	0.00871756	0.00522538	0.00697514	0.00522538	0.0121498		0.00872664	0.00873573	0.00522281	0.00871756	0.0243392	0.0122094	0.00522538	0.00611561	0.00611561	0.00522538
LEP88469 Cossidae Comadia redtenbacheri Emperatriz COI	0.182664	0.121771	0.0852634	0.00522444	0.00348827	0.00348827	0.00348827	0	0.00348827	0.00348827	0.00367666	0	0.00348827	0	0.00390708	0	0	0.00348827	0.00173616	0.00348827	0.0103972	0.00872664		0	0.00347047	0	0.0157224	0.00697089	0.00348827	0.00401419	0.00401419	0.00348827
LEP88470 Cossidae Comadia redtenbacheri Recuerdo COI	0.182719	0.121802	0.0853093	0.00523148	0.00349829	0.00349829	0.00349829	0	0.00349829	0.00349829	0.00368728	0	0.00349829	0	0.00391842	0	0	0.00349829	0.00173319	0.00349829	0.00871886	0.00873573	0		0.00346029	0	0.0139986	0.00697497	0.00349829	0.00402563	0.00402563	0.00349829
LEP88471 Cossidae Comadia redtenbacheri Diamante COI	0.182761	0.121816	0.0835822	0.00173023	0	0	0	0.00346045	0	0	0	0.00346045	0	0.00346045	0	0.00346045	0.00346045	0	0.00519068	0	0.00522095	0.00522281	0.00347047	0.00346029		0.00346045	0.0174679	0.00695535	0	0	0	0
LEP88472 Cossidae Comadia redtenbacheri Don Nilo COI	0.182609	0.121739	0.0852174	0.00521739	0.00347826	0.00347826	0.00347826	0	0.00347826	0.00347826	0.00366604	0	0.00347826	0	0.00389574	0	0	0.00347826	0.00173913	0.00347826	0.00870069	0.00871756	0	0	0.00346045		0.0139978	0.00696681	0.00347826	0.00400275	0.00400275	0.00347826
LEP88473 Cossidae Comadia redtenbacheri Burro COI	0.192545	0.129826	0.0948624	0.0192023	0.0174839	0.0174839	0.0174839	0.0139978	0.0174839	0.0174839	0.00727575	0.0139978	0.0174839	0.0139978	0.00768468	0.0139978	0.0139978	0.0174839	0.0157162	0.0174839	0.0139193	0.0243392	0.0157224	0.0139986	0.0174679	0.0139978		0.0209444	0.0174839	0.00397511	0.00397511	0.0174839
LEP88474 Cossidae Comadia redtenbacheri Beneva COI	0.182474	0.125092	0.0834023	0.00872514	0.00696681	0.00696681	0.00696681	0.00696681	0.00696681	0.00696681	0.00365163	0.00696681	0.00696681	0.00696681	0.00381803	0.00696681	0.00696681	0.00696681	0.00872514	0.00696681	0.0121619	0.0122094	0.00697089	0.00697497	0.00695535	0.00696681	0.0209444		0.00696681	0.00410441	0.00410441	0.00696681
LNAUS061N12 Comadia redtenbacheri COIN5P	0.182609	0.121739	0.0834783	0.00173913	0	0	0	0.00347826	0	0	0	0.00347826	0	0.00347826	0	0.00347826	0.00347826	0	0.00521739	0	0.00522351	0.00522538	0.00348827	0.00349829	0	0.00347826	0.0174839	0.00696681		0	0	0
LNAUS062N12 Comadia redtenbacheri COIN5P	0.185722	0.119936	0.0821945	0.00205969	0	0	0	0.00400275	0	0	0	0.00400275	0	0.00400275	0	0.00400275	0.00400275	0	0.00606446	0	0	0.00611561	0.00401419	0.00402563	0	0.00400275	0.00397511	0.00410441	0		0	0
LNAUS063N12 Comadia redtenbacheri COIN5P	0.185722	0.119936	0.0821945	0.00205969	0	0	0	0.00400275	0	0	0	0.00400275	0	0.00400275	0	0.00400275	0.00400275	0	0.00606446	0	0	0.00611561	0.00401419	0.00402563	0	0.00400275	0.00397511	0.00410441	0	0		0
LNAUS107N12 Comadia redtenbacheri COIN5P	0.182609	0.121739	0.0834783	0.00173913	0	0	0	0.00347826	0	0	0	0.00347826	0	0.00347826	0	0.00347826	0.00347826	0	0.00521739	0	0.00522351	0.00522538	0.00348827	0.00349829	0	0.00347826	0.0174839	0.00696681	0	0	0
